# Supplementary material
Source: publisher figshare collection journal article supplement (https://gsajournals.figshare.com/ndownloader/files/31954193)
Supplement: Supplementary file 1 [file 31954193]

## Sheet: TableS7_Complete_Results_allTra
Table S9: Results from the genome-wide association study conducted herein for grain carotenoid and kernel color traits. Physical positions (bp) are reported in RefGen_v2 coordinates (where indicated with 'v2') and RefGen_v4 coordinates (where indicated with 'v4'). Trait names are as written (α = a, β = b), unless shortened as follows: zeinoxanthin (zeino), total carotenoids (total_carot), kernel …
Trait	Chr_v2	bp_v2	Chr_v4	bp_v4	allele	RMIPx100	cSI
phytofluene	1	13114964	Chr1	13320332	C/T_hm1	10	1
phytofluene	1	12792329	Chr1	12985632	G/C_hm2	9	1
b_cryp	1	29309071	Chr1	29570615	G/A_hm2	53	2
b_cryp	1	29309113	Chr1	29570657	-/+_hm2	7	2
zeino	1	87500478	Chr1	89394590	C/G_hm2	54	3
lutein	1	86753401	Chr1	88608411	A/G_hm2	27	3
lutein	1	86727977	Chr1	88582908	G/A_hm2	26	3
zeino	1	88051949	Chr1	89998577	A/G_hm2	6	3
lutein	1	86729896	Chr1	88584827	T/C_hm2	5	3
b_cryp	2	1628969	Chr2	1621967	T/G_hm2	8	4
b_cryp	2	1016921	Chr2	1000780	A/G_hm2	5	4
zeaxanthin	2	44596157	Chr2	46426053	T/C_hm2	47	6
total_carot	2	48502082	Chr2	50528818	A/T_hm2	27	6
total_carot	2	49056858	Chr2	51106796	G/T_hm2	21	6
b_cryp	2	49115353	Chr2	51165292	G/A_hm2	17	6
total_carot	2	48502073	Chr2	50528827	C/T_hm2	16	6
b_cryp	2	48418463	Chr2	50471573	-/A_hm1	13	6
phytofluene	2	49079769	Chr2	51129706	A/G_hm2	5	6
zeino	3	217008550	Chr3	220593903	C/G_hm1	10	8
lutein	3	217214782	Chr3	220826795	T/G_hm1	7	8
lutein	3	217227451	Chr3	220839555	G/A_hm2	7	8
zeino	3	215521306	Chr3	219128835	G/A_hm2	7	8
lutein	3	217097199	Chr3	220679129	C/A_hm2	5	8
lutein	3	217227400	Chr3	220839504	C/T_hm2	5	8
zeino	3	212547670	Chr3	216243650	T/A_hm2	5	8
zeaxanthin	4	67874591	Chr4	70469506	C/A_hm2	24	10
zeaxanthin	4	73477457	Chr4	76214184	C/T_hm2	16	10
lutein	4	155833792	Chr4	159351459	C/T_hm2	15	10
phytofluene	4	156237324	Chr4	159759876	G/T_hm2	12	10
phytofluene	4	155878793	Chr4	159396069	T/G_hm2	8	10
a_carotene	4	45768594	Chr4	47777773	-------/CCGCCGT_hm1	7	10
phytofluene	4	154795611	Chr4	158330333	T/A_hm2	6	10
zeaxanthin	4	66912335	Chr4	69404648	A/C_hm2	6	10
lutein	4	156344938	Chr4	159870233	C/T_hm1	5	10
b_cryp	4	235250774	Chr4	240476036	T/A_hm2	39	11
b_cryp	4	235668091	Chr4	240923765	T/C_hm2	21	11
b_cryp	4	235275039	Chr4	240500300	T/A_hm2	14	11
b_cryp	4	235456427	Chr4	240710686	A/G_hm2	11	11
b_cryp	4	235120922	Chr4	240333433	C/T_hm2	6	11
b_cryp	4	235723381	Chr4	240979131	A/C_hm2	6	11
b_cryp	5	2413419	Chr5	2486021	T/C_hm1	15	12
total_carot	5	59980218	Chr5	61809095	G/A_hm2	25	13
lutein	5	138875826	Chr5	142228645	A/G_hm2	21	13
zeaxanthin	5	112937789	Chr5	115758550	G/A_hm2	18	13
zeino	5	105007375	Chr5	107608050	T/C_hm1	18	13
traitKC	5	60937768	Chr5	62775673	T/C_hm2	15	13
phytofluene	5	43753112	Chr5	45078510	G/A_hm2	14	13
phytofluene	5	51427283	Chr5	53031393	C/G_hm1	13	13
total_carot	5	49891463	Chr5	51441650	A/G_hm2	11	13
zeaxanthin	5	112909836	Chr5	115717808	G/A_hm2	10	13
total_carot	5	60244196	Chr5	62074892	C/T_hm2	9	13
zeino	5	135909196	Chr5	139218112	C/T_hm2	9	13
traitKC	5	59383864	Chr5	61194599	C/T_hm2	6	13
phytofluene	5	43754141	Chr5	45079539	G/T_hm2	5	13
zeino	5	97977472	Chr5	100475486	G/A_hm2	5	13
traitKC	6	81890575	Chr6	84937972	C/T_hm1	57	14
lutein	6	82471482	Chr6	85524781	A/G_hm2	42	14
total_carot	6	82725026	Chr6	85773987	A/T_hm2	36	14
total_carot	6	82758153	Chr6	85803413	--/TT_hm1	31	14
zeaxanthin	6	84385887	Chr6	87489860	C/T_hm2	22	14
lutein	6	81612596	Chr6	84655237	A/G_hm2	20	14
zeaxanthin	6	84201697	Chr6	87306656	G/A_hm2	20	14
b_cryp	6	82286225	Chr6	85344497	G/A_hm2	17	14
total_carot	6	82809729	Chr6	85853714	G/T_hm2	17	14
phytofluene	6	77507621	Chr6	80519178	A/C_hm2	15	14
lutein	6	82120841	Chr6	85163874	G/A_hm2	10	14
lutein	6	83216299	Chr6	86342004	C/T_hm2	8	14
b_cryp	6	82641357	Chr6	85695460	G/T_hm2	7	14
phytofluene	6	73823838	Chr6	76646035	T/C_hm2	7	14
phytofluene	6	78965909	Chr6	81957079	C/T_hm2	7	14
phytofluene	6	79571790	Chr6	82579986	C/T_hm2	7	14
total_carot	6	82809776	Chr6	85853761	A/G_hm2	7	14
phytofluene	6	79664214	Chr6	82675047	G/A_hm2	6	14
total_carot	6	82941923	Chr6	85986034	A/G_hm2	6	14
traitKC	6	81702406	Chr6	84751354	C/T_hm2	6	14
zeaxanthin	6	83539772	Chr6	86658844	C/T_hm2	5	14
zeaxanthin	6	84787603	Chr6	87899310	G/A_hm2	5	14
phytofluene	7	13965907	Chr7	14380064	A/G_hm2	46	15
b_cryp	7	14152717	Chr7	14570578	C/G_hm2	34	15
lutein	7	14463775	Chr7	14882645	T/G_hm2	19	15
b_carotene	7	14045523	Chr7	14452686	T/A_hm2	17	15
zeino	7	14229882	Chr7	14647641	T/C_hm2	15	15
traitKC	7	15055144	Chr7	15545630	G/C_hm2	14	15
zeino	7	13664748	Chr7	14161052	G/A_hm1	14	15
a_carotene	7	13845914	Chr7	14303984	T/C_hm1	13	15
b_carotene	7	14081439	Chr7	14498288	T/C_hm1	12	15
total_carot	7	14482593	Chr7	14863833	G/A_hm2	12	15
zeino	7	14279380	Chr7	14696093	G/A_hm2	11	15
b_carotene	7	14024066	Chr7	14433055	T/C_hm2	10	15
traitKC	7	14279735	Chr7	14696448	C/T_hm1	10	15
traitKC	7	161373403	Chr7	20066044	T/C_hm2	10	15
total_carot	7	14463775	Chr7	14882645	T/G_hm2	9	15
a_carotene	7	13845020	Chr7	14303090	T/G_hm1	8	15
b_carotene	7	14045586	Chr7	14452623	C/A_hm2	8	15
phytofluene	7	14229882	Chr7	14647641	T/C_hm2	8	15
total_carot	7	15274619	Chr7	15757176	C/T_hm2	7	15
traitKC	7	14727888	Chr7	15218142	T/C_hm2	7	15
phytofluene	7	13664232	Chr7	14160536	G/A_hm2	6	15
phytofluene	7	14898025	Chr7	15390099	A/C_hm2	5	15
phytofluene	7	15127010	Chr7	15643370	A/C_hm2	5	15
total_carot	7	14279380	Chr7	14696093	G/A_hm2	5	15
total_carot	7	14320775	Chr7	14730557	G/C_hm2	5	15
traitKC	7	13977359	Chr7	14391508	C/T_hm2	5	15
traitKC	7	14465762	Chr7	14880658	T/C_hm2	5	15
b_cryp	7	139525864	Chr7	144297344	-/C_hm1	23	16
b_cryp	7	141839947	Chr7	146767897	T/A_hm2	23	16
b_cryp	7	135570567	Chr7	142441417	T/C_hm1	10	16
b_cryp	7	140120365	Chr7	144647064	G/A_hm2	7	16
b_cryp	7	139748730	Chr7	144511235	-/+_hm2	5	16
phytofluene	7	151802004	Chr7	157175210	G/A_hm2	33	17
phytofluene	7	150035244	Chr7	155275151	A/T_hm2	19	17
zeino	7	153856923	Chr7	159190823	G/A_hm1	9	17
phytofluene	7	151985920	Chr7	157357338	-/+_hm2	8	17
phytofluene	7	150876921	Chr7	156185740	C/G_hm2	7	17
phytofluene	7	151381308	Chr7	156742417	G/A_hm1	7	17
zeino	7	154269511	Chr7	159576253	T/G_hm2	5	17
zeino	7	154298456	Chr7	159605492	A/T_hm1	5	17
zeaxanthin	7	164782831	Chr7	170346012	T/C_hm2	18	18
zeaxanthin	7	164238371	Chr7	169768481	A/G_hm2	11	18
zeaxanthin	7	164652997	Chr7	170215451	-----/TGGAA_hm1	11	18
zeaxanthin	7	164652995	Chr7	170215449	-/+_hm2	5	18
zeaxanthin	7	164793679	Chr7	170356870	+/-_hm2	5	18
phytofluene	7	173955678	Chr7	179475548	C/T_hm2	24	19
phytofluene	7	173949791	Chr7	179469661	T/C_hm2	12	19
phytofluene	7	174130835	Chr7	179655457	T/A_hm2	11	19
phytofluene	7	174222499	Chr7	179746349	C/T_hm2	6	19
phytofluene	7	173889954	Chr7	179417631	+/-_hm2	5	19
phytofluene	7	174224087	Chr7	179747937	T/C_hm2	5	19
total_carot	8	118785027	Chr8	121751981	C/T_hm2	38	20
total_carot	8	119888835	Chr8	122930022	G/A_hm1	9	20
traitKC	8	139376251	Chr8	143529784	G/C_hm2	66	21
lutein	8	138883056	Chr8	143021025	G/C_hm2	64	21
b_cryp	8	138883056	Chr8	143021025	G/C_hm2	63	21
a_carotene	8	138867187	Chr8	143005164	G/T_hm2	57	21
zeino	8	138883056	Chr8	143021025	G/C_hm2	57	21
b_carotene	8	138883056	Chr8	143021025	G/C_hm2	47	21
lutein	8	138777606	Chr8	142909540	G/A_hm2	30	21
zeaxanthin	8	138883056	Chr8	143021025	G/C_hm2	16	21
lutein	8	138811681	Chr8	142949187	C/T_hm2	13	21
zeaxanthin	8	138753928	Chr8	142884289	C/T_hm2	13	21
lutein	8	138425418	Chr8	142507231	T/A_hm2	11	21
b_carotene	8	139130502	Chr8	143274215	T/C_hm2	10	21
zeaxanthin	8	138523705	Chr8	142606871	G/A_hm2	8	21
a_carotene	8	138913032	Chr8	143050494	G/A_hm1	7	21
b_carotene	8	141804249	Chr8	145980321	T/A_hm2	7	21
zeaxanthin	8	138636505	Chr8	142724272	T/C_hm2	7	21
zeino	8	138867187	Chr8	143005164	G/T_hm2	6	21
b_cryp	8	138911749	Chr8	143049211	C/A_hm1	5	21
zeaxanthin	8	138789624	Chr8	142921556	C/G_hm2	5	21
a_carotene	9	10207183	Chr9	9604521	T/A_hm2	9	22
a_carotene	9	11460586	Chr9	10873266	T/G_hm2	8	22
b_carotene	9	8042848	Chr9	7608701	G/A_hm2	8	22
a_carotene	9	8458848	Chr9	8146223	C/G_hm1	7	22
a_carotene	9	11219560	Chr9	10610481	A/G_hm2	7	22
a_carotene	9	8502777	Chr9	8190152	G/A_hm2	6	22
b_carotene	9	11780553	Chr9	11224634	T/C_hm2	6	22
a_carotene	9	11064523	Chr9	10450896	+/-_hm2	5	22
b_cryp	9	20453001	Chr9	20232116	C/T_hm2	48	23
zeaxanthin	9	20473019	Chr9	20252133	G/C_hm1	26	23
zeaxanthin	9	20473019	Chr9	20252133	G/C_hm2	26	23
zeino	9	20456680	Chr9	20235795	A/G_hm2	16	23
zeaxanthin	9	20473015	Chr9	20252129	A/G_hm1	15	23
zeaxanthin	9	20473015	Chr9	20252129	A/G_hm2	15	23
zeaxanthin	9	20478902	Chr9	20258016	G/A_hm1	14	23
b_cryp	9	20464658	Chr9	20243773	A/G_hm2	13	23
zeino	9	20453299	Chr9	20232414	A/C_hm2	13	23
zeino	9	20666367	Chr9	20447580	G/C_hm1	5	23
total_carot	9	149770393	Chr9	152904203	C/T_hm2	23	24
lutein	9	149770393	Chr9	152904203	C/T_hm2	12	24
lutein	9	150251803	Chr9	153421361	-/+_hm2	11	24
lutein	9	150174929	Chr9	153334206	G/T_hm2	8	24
lutein	9	150165309	Chr9	153332846	C/T_hm2	7	24
lutein	9	150315748	Chr9	153485378	-/+_hm2	6	24
total_carot	9	150197564	Chr9	153366931	G/A_hm2	6	24
total_carot	9	149635417	Chr9	152737783	C/T_hm2	5	24
total_carot	9	150638388	Chr9	153809529	C/G_hm2	5	24
b_cryp	9	154099052	Chr9	157246641	T/A_hm2	23	26
zeaxanthin	9	153661896	Chr9	156823624	G/A_hm2	22	26
b_cryp	9	156096675	Chr9	159179173	T/C_hm1	16	26
zeaxanthin	9	153609361	Chr9	156770235	A/T_hm2	15	26
zeaxanthin	9	153609361	Chr9	156770235	A/T_hm1	15	26
b_cryp	9	154029823	Chr9	157178280	G/A_hm2	7	26
b_cryp	9	154688139	Chr9	157865860	C/T_hm2	7	26
zeaxanthin	10	118966486	Chr10	120020293	C/T_hm2	34	27
zeaxanthin	10	118709197	Chr10	119743354	G/A_hm2	10	27
total_carot	10	119503541	Chr10	120539060	C/T_hm2	8	27
b_carotene	10	132961468	Chr10	134160203	+/-_hm2	22	28
b_carotene	10	132558701	Chr10	133784014	C/T_hm2	12	28
zeaxanthin	10	136454829	Chr10	137671112	C/G_hm2	20	29
zeaxanthin	10	136442835	Chr10	137659120	C/G_hm2	13	29
zeaxanthin	10	136296484	Chr10	137512295	A/G_hm2	9	29
zeaxanthin	10	136365547	Chr10	137581644	T/A_hm2	6	29
phytofluene	1	17684733	Chr1	17989882	C/T_hm1	33	NA
phytofluene	1	12144361	Chr1	12333968	C/T_hm2	28	NA
zeino	1	93334102	Chr1	95482056	G/A_hm2	25	NA
lutein	1	87633815	Chr1	89555307	C/T_hm2	23	NA
zeaxanthin	1	286233524	Chr1	291378628	T/C_hm2	20	NA
zeaxanthin	1	77082827	Chr1	78589273	A/G_hm2	16	NA
zeaxanthin	1	75956000	Chr1	77396154	----/ACTA_hm1	12	NA
total_carot	1	232600240	Chr1	236196209	G/A_hm1	11	NA
lutein	1	87472785	Chr1	89366901	G/A_hm2	10	NA
phytofluene	1	16833491	Chr1	17197298	T/C_hm2	10	NA
phytofluene	1	280634147	Chr1	285739588	G/C_hm2	10	NA
phytofluene	1	290234846	Chr1	295719207	A/G_hm2	10	NA
phytofluene	1	290301018	Chr1	295774664	T/A_hm2	10	NA
zeino	1	84543113	Chr1	86266224	-/C_hm1	10	NA
b_carotene	1	16474697	Chr1	16849146	A/G_hm2	9	NA
lutein	1	87832592	Chr1	89730744	C/T_hm2	9	NA
zeaxanthin	1	3073396	Chr1	3167947	A/C_hm2	9	NA
a_carotene	1	285914514	Chr1	291048918	T/C_hm2	8	NA
a_carotene	1	287820474	Chr1	293010392	T/C_hm2	8	NA
lutein	1	239266155	Chr1	242852944	G/A_hm2	8	NA
total_carot	1	238610822	Chr1	242194867	G/A_hm2	8	NA
zeaxanthin	1	18720964	Chr1	19115081	T/C_hm2	8	NA
lutein	1	87472756	Chr1	89366872	G/A_hm2	7	NA
zeaxanthin	1	2397541	Chr1	2423088	C/T_hm2	7	NA
zeino	1	15996087	Chr1	16233161	T/G_hm2	7	NA
a_carotene	1	287851839	Chr1	293041757	G/C_hm2	6	NA
lutein	1	238610822	Chr1	242194867	G/A_hm2	6	NA
zeaxanthin	1	3029139	Chr1	3123937	T/C_hm1	6	NA
zeaxanthin	1	3029139	Chr1	3123937	C/T_hm2	6	NA
b_carotene	1	299368249	Chr1	304919195	A/C_hm2	5	NA
lutein	1	239201916	Chr1	242788677	T/C_hm2	5	NA
phytofluene	1	206740220	Chr1	209573766	C/A_hm2	5	NA
total_carot	1	288736577	Chr1	294121729	C/T_hm1	5	NA
total_carot	1	299548902	Chr1	305095396	G/A_hm2	5	NA
zeaxanthin	1	280778913	Chr1	285873581	+/-_hm2	5	NA
zeaxanthin	1	287597448	Chr1	292779124	A/G_hm2	5	NA
zeino	1	19236170	Chr1	19569176	-----/ATCCT_hm1	5	NA
traitKC	2	48502082	Chr2	50528818	A/T_hm2	29	NA
zeaxanthin	2	175090010	Chr2	180012326	G/T_hm2	17	NA
b_cryp	2	2229060	Chr2	2228270	C/G_hm2	16	NA
phytofluene	2	2366817	Chr2	2350263	C/T_hm2	15	NA
total_carot	2	58649529	Chr2	60812731	G/A_hm2	15	NA
zeino	2	56314151	Chr2	58378222	C/A_hm2	13	NA
b_carotene	2	228861474	Chr2	235927599	A/T_hm2	12	NA
traitKC	2	186174234	Chr2	191769788	A/G_hm1	12	NA
b_carotene	2	232182047	Chr2	239092755	T/C_hm2	11	NA
lutein	2	235617816	Chr2	243672014	G/A_hm1	11	NA
zeino	2	2044497	Chr2	2041536	C/A_hm2	11	NA
b_carotene	2	10603051	Chr2	10722175	C/A_hm2	10	NA
zeaxanthin	2	174984059	Chr2	179832233	G/A_hm2	10	NA
lutein	2	235617820	Chr2	243672018	C/T_hm1	9	NA
traitKC	2	22380375	Chr2	23647632	G/T_hm2	9	NA
traitKC	2	44888052	Chr2	46751524	T/C_hm2	9	NA
traitKC	2	49116695	Chr2	51166634	C/T_hm2	9	NA
zeaxanthin	2	49056858	Chr2	51106796	G/T_hm2	9	NA
a_carotene	2	2043733	Chr2	2040772	C/T_hm2	7	NA
b_carotene	2	11206236	Chr2	11325425	G/A_hm2	7	NA
b_carotene	2	11206237	Chr2	11325426	C/T_hm2	7	NA
lutein	2	235647548	Chr2	243696300	T/C_hm2	7	NA
phytofluene	2	66712931	Chr2	68555251	A/T_hm2	7	NA
phytofluene	2	68092524	Chr2	69941539	G/A_hm2	7	NA
traitKC	2	206500370	Chr2	213346819	T/C_hm1	7	NA
zeaxanthin	2	233115706	Chr2	240010184	T/A_hm2	7	NA
a_carotene	2	2435127	Chr2	187223938	A/G_hm2	6	NA
b_carotene	2	10388515	Chr2	10511635	T/G_hm2	6	NA
b_carotene	2	10607359	Chr2	10726483	A/G_hm2	6	NA
b_cryp	2	2168262	Chr2	2169079	G/T_hm2	6	NA
b_cryp	2	40154406	Chr2	41789579	A/T_hm2	6	NA
traitKC	2	44596157	Chr2	46426053	T/C_hm2	6	NA
traitKC	2	205720010	Chr2	212562592	AA/--_hm1	6	NA
zeaxanthin	2	178271484	Chr2	183699324	C/A_hm2	6	NA
a_carotene	2	14166006	Chr2	14561082	T/C_hm2	5	NA
b_carotene	2	226708946	Chr2	233731164	C/A_hm2	5	NA
b_cryp	2	24737235	Chr2	26047424	A/G_hm1	5	NA
b_cryp	2	33884005	Chr2	35448478	T/G_hm2	5	NA
lutein	2	236973288	Chr2	241125638	-/G_hm1	5	NA
phytofluene	2	326239	Chr2	350917	C/T_hm2	5	NA
traitKC	2	176625232	Chr2	181888381	T/C_hm2	5	NA
zeaxanthin	2	45150059	Chr2	47058219	C/T_hm2	5	NA
zeaxanthin	2	232970853	Chr2	239871692	C/T_hm2	5	NA
zeino	2	2045209	Chr2	2042248	T/C_hm2	5	NA
zeino	2	10788070	Chr2	10908458	G/A_hm1	5	NA
zeino	3	231999825	Chr3	234669260	A/G_hm2	16	NA
b_carotene	3	208470672	Chr3	212038687	C/T_hm2	14	NA
phytofluene	3	137786449	Chr3	138468019	----/GCAT_hm1	13	NA
traitKC	3	183644019	Chr3	186605202	G/A_hm2	13	NA
zeaxanthin	3	226821165	Chr3	230738073	C/T_hm2	13	NA
zeino	3	212079028	Chr3	215750407	C/T_hm2	13	NA
total_carot	3	217097199	Chr3	220679129	C/A_hm2	12	NA
lutein	3	5849527	Chr3	5021044	T/C_hm2	11	NA
lutein	3	136263188	Chr3	136995628	A/C_hm2	11	NA
zeaxanthin	3	1684973	Chr3	972603	A/G_hm2	10	NA
phytofluene	3	205800463	Chr3	209258685	A/G_hm2	9	NA
total_carot	3	217274021	Chr3	220919603	T/C_hm1	9	NA
a_carotene	3	177029967	Chr3	179782449	C/T_hm2	8	NA
zeaxanthin	3	1849451	Chr3	1168755	A/T_hm2	8	NA
zeaxanthin	3	225460436	Chr3	229262043	A/G_hm2	8	NA
lutein	3	5811948	Chr3	4976245	C/T_hm2	7	NA
zeaxanthin	3	184931944	Chr3	187943119	T/A_hm2	7	NA
b_cryp	3	36470005	Chr3	36199355	A/C_hm2	6	NA
lutein	3	4148813	Chr3	3422302	C/T_hm2	6	NA
lutein	3	24720736	Chr3	24213168	G/A_hm1	6	NA
phytofluene	3	170739320	Chr3	173376161	T/C_hm2	6	NA
total_carot	3	217462599	Chr3	221069218	C/G_hm1	6	NA
a_carotene	3	176562923	Chr3	179140692	T/C_hm1	5	NA
b_cryp	3	176074852	Chr3	178630276	A/T_hm2	5	NA
phytofluene	3	164054814	Chr3	166700582	A/C_hm2	5	NA
phytofluene	3	173517480	Chr3	175961803	G/A_hm1	5	NA
total_carot	3	217147283	Chr3	220758252	T/G_hm2	5	NA
traitKC	3	206555138	Chr3	210023720	A/T_hm2	5	NA
traitKC	3	225832172	Chr3	229673864	T/C_hm2	5	NA
traitKC	3	227395513	Chr3	231310628	C/G_hm2	5	NA
zeaxanthin	3	208116222	Chr3	211670153	A/G_hm2	5	NA
phytofluene	4	2054925	Chr4	2610822	A/G_hm2	40	NA
total_carot	4	151081537	Chr4	154588420	-/+_hm2	33	NA
b_cryp	4	66934880	Chr4	69435000	A/G_hm2	18	NA
zeaxanthin	4	227267188	Chr4	232240471	C/T_hm2	15	NA
b_cryp	4	68887066	Chr4	71572038	T/G_hm2	14	NA
traitKC	4	221690181	Chr4	226035420	T/G_hm2	10	NA
traitKC	4	234791492	Chr4	240005172	C/T_hm2	10	NA
zeaxanthin	4	212177159	Chr4	216174607	T/C_hm2	10	NA
phytofluene	4	1483302	Chr4	1739375	G/A_hm2	9	NA
traitKC	4	4389050	Chr4	5209945	G/T_hm2	9	NA
traitKC	4	227230740	Chr4	232198549	A/T_hm2	9	NA
a_carotene	4	224724007	Chr4	229054605	T/C_hm2	8	NA
phytofluene	4	170974190	Chr4	173985084	T/A_hm2	8	NA
traitKC	4	4405709	Chr4	5228447	C/G_hm1	8	NA
a_carotene	4	151135702	Chr4	154649702	G/A_hm2	7	NA
lutein	4	176533328	Chr4	179569540	A/G_hm2	7	NA
phytofluene	4	2054894	Chr4	2610791	G/A_hm2	7	NA
phytofluene	4	146361775	Chr4	149730532	A/C_hm2	7	NA
phytofluene	4	151976762	Chr4	155508516	A/C_hm1	7	NA
total_carot	4	173315099	Chr4	176346854	G/A_hm2	7	NA
b_cryp	4	232704306	Chr4	237849404	G/A_hm2	6	NA
phytofluene	4	163447935	Chr4	166119787	G/C_hm2	6	NA
total_carot	4	173312157	Chr4	176343913	G/A_hm2	6	NA
total_carot	4	188193241	Chr4	192092238	T/G_hm2	6	NA
total_carot	4	188308984	Chr4	191977482	G/C_hm2	6	NA
traitKC	4	201303305	Chr4	205629263	T/C_hm2	6	NA
zeaxanthin	4	237691719	Chr4	242961818	C/T_hm2	6	NA
a_carotene	4	156378166	Chr4	159905051	---/TTA_hm1	5	NA
b_cryp	4	66913112	Chr4	69403871	C/T_hm2	5	NA
lutein	4	22979887	Chr4	24422097	C/T_hm2	5	NA
lutein	4	24745961	Chr4	26318773	C/T_hm2	5	NA
lutein	4	173819316	Chr4	176858403	-/+_hm2	5	NA
total_carot	4	188488944	Chr4	192657544	T/C_hm2	5	NA
traitKC	4	221864482	Chr4	226138625	A/G_hm2	5	NA
b_cryp	5	4769022	Chr5	4880327	G/C_hm2	24	NA
traitKC	5	143944868	Chr5	147329368	G/A_hm2	21	NA
b_carotene	5	77699269	Chr5	79979339	G/A_hm2	17	NA
b_carotene	5	192147476	Chr5	197518122	-/+_hm2	12	NA
phytofluene	5	3539747	Chr5	3613187	T/C_hm2	12	NA
total_carot	5	3094824	Chr5	3205333	C/T_hm1	12	NA
b_cryp	5	127650990	Chr5	130996017	G/A_hm2	10	NA
b_cryp	5	175728100	Chr5	179755179	-------/TGCTTGG_hm1	10	NA
phytofluene	5	3325029	Chr5	3408164	G/C_hm2	9	NA
zeaxanthin	5	41277072	Chr5	42528778	C/G_hm1	9	NA
zeaxanthin	5	46070712	Chr5	47552036	A/G_hm2	9	NA
b_carotene	5	181199736	Chr5	185771406	C/G_hm2	8	NA
total_carot	5	2762461	Chr5	2844967	C/T_hm2	8	NA
total_carot	5	78381711	Chr5	80676846	C/G_hm2	8	NA
zeino	5	189599550	Chr5	194669938	G/A_hm2	8	NA
phytofluene	5	25539491	Chr5	26160924	C/T_hm2	7	NA
phytofluene	5	80927935	Chr5	83127225	C/T_hm2	7	NA
b_cryp	5	3429090	Chr5	3493183	G/C_hm1	6	NA
phytofluene	5	35969707	Chr5	37220895	A/G_hm2	6	NA
traitKC	5	163345837	Chr5	167195559	T/C_hm2	6	NA
zeaxanthin	5	45068209	Chr5	46432034	C/T_hm2	6	NA
zeaxanthin	5	45974476	Chr5	47439062	A/G_hm2	6	NA
zeaxanthin	5	45981740	Chr5	47446325	G/A_hm2	6	NA
zeaxanthin	5	56453508	Chr5	58255452	A/G_hm2	6	NA
b_carotene	5	181398111	Chr5	185985833	C/T_hm2	5	NA
lutein	5	78181823	Chr5	80489255	C/T_hm2	5	NA
phytofluene	5	76109415	Chr5	78395172	G/T_hm1	5	NA
total_carot	5	3094870	Chr5	3205379	G/A_hm2	5	NA
total_carot	5	11524695	Chr5	11862925	+/-_hm2	5	NA
total_carot	5	14610045	Chr5	15106342	G/A_hm2	5	NA
zeaxanthin	5	185405506	Chr5	190054819	C/A_hm1	5	NA
total_carot	6	87655988	Chr6	90453559	G/T_hm2	25	NA
zeaxanthin	6	34647876	Chr6	36185216	C/T_hm2	14	NA
zeaxanthin	6	149448454	Chr6	153533157	A/G_hm2	13	NA
zeaxanthin	6	149332751	Chr6	153416587	C/T_hm2	11	NA
b_carotene	6	82286225	Chr6	85344497	G/A_hm2	10	NA
b_carotene	6	82754015	Chr6	85799275	G/A_hm2	10	NA
b_carotene	6	165532458	Chr6	169684042	A/G_hm2	9	NA
traitKC	6	2242218	Chr6	2258594	C/T_hm1	9	NA
zeaxanthin	6	85608332	Chr6	88358508	G/C_hm1	9	NA
a_carotene	6	68766893	Chr6	71684105	T/C_hm2	8	NA
b_carotene	6	3185887	Chr6	3224347	C/G_hm2	8	NA
total_carot	6	8213027	Chr6	8640331	T/A_hm2	8	NA
b_carotene	6	27291554	Chr6	28728890	G/A_hm2	7	NA
b_carotene	6	128637171	Chr6	132628790	G/C_hm2	7	NA
b_carotene	6	165624991	Chr6	169776516	A/C_hm2	7	NA
zeaxanthin	6	16350084	Chr6	18617146	C/A_hm2	7	NA
a_carotene	6	167963107	Chr6	172190949	C/A_hm2	6	NA
lutein	6	2460152	Chr6	2475697	A/G_hm2	6	NA
zeaxanthin	6	147208759	Chr6	151254395	C/T_hm2	6	NA
zeino	6	82471482	Chr6	85524781	A/G_hm2	6	NA
zeino	6	82894967	Chr6	85936608	A/G_hm2	6	NA
zeino	6	82901344	Chr6	85942985	A/G_hm2	6	NA
a_carotene	6	166754050	Chr6	170907470	T/C_hm2	5	NA
a_carotene	6	167964622	Chr6	172192464	T/C_hm2	5	NA
b_cryp	6	22654904	Chr6	21015454	C/T_hm2	5	NA
b_cryp	6	88745338	Chr6	91338717	C/G_hm2	5	NA
lutein	6	3972708	Chr6	4022384	C/T_hm2	5	NA
total_carot	6	84281185	Chr6	87385902	----/GTCT_hm1	5	NA
traitKC	6	2242347	Chr6	2258723	C/T_hm2	5	NA
zeaxanthin	6	28401706	Chr6	29894955	T/G_hm2	5	NA
zeaxanthin	6	88739474	Chr6	91332855	T/C_hm2	5	NA
zeino	6	25289495	Chr6	26665318	C/G_hm2	5	NA
zeino	6	82862142	Chr6	85905423	----/ATAC_hm1	5	NA
zeino	6	82941923	Chr6	85986034	A/G_hm2	5	NA
lutein	7	147351573	Chr7	152584686	C/T_hm1	47	NA
total_carot	7	172725478	Chr7	178152823	C/T_hm2	26	NA
zeino	7	9097586	Chr7	9396736	T/C_hm1	19	NA
b_carotene	7	170396563	Chr7	176001272	G/A_hm1	17	NA
b_carotene	7	172214828	Chr7	178600222	G/T_hm1	17	NA
traitKC	7	123673352	Chr7	127679355	C/T_hm2	16	NA
zeino	7	161096977	Chr7	166584728	G/A_hm2	12	NA
zeino	7	6504796	Chr7	6874201	A/T_hm2	11	NA
zeaxanthin	7	8292322	Chr7	8589590	G/A_hm1	10	NA
total_carot	7	154790172	Chr7	160134011	T/C_hm2	9	NA
a_carotene	7	27967017	Chr7	29105481	A/G_hm2	8	NA
b_carotene	7	2177514	Chr7	2292898	T/C_hm2	8	NA
total_carot	7	148183182	Chr7	126110968	G/A_hm2	8	NA
zeino	7	146245608	Chr7	151216427	-/A_hm1	8	NA
b_carotene	7	2191306	Chr7	2306689	C/A_hm2	7	NA
b_carotene	7	172144162	Chr7	178682691	AGCGTAC/-------_hm1	7	NA
phytofluene	7	15527008	Chr7	16020551	G/A_hm2	7	NA
b_carotene	7	170396562	Chr7	176001271	G/C_hm1	6	NA
lutein	7	15673680	Chr7	16176969	C/T_hm2	6	NA
traitKC	7	161692780	Chr7	167123882	A/T_hm2	6	NA
zeaxanthin	7	8687503	Chr7	8973278	A/G_hm2	6	NA
a_carotene	7	1981001	Chr7	2111209	C/A_hm2	5	NA
a_carotene	7	27709862	Chr7	28806408	C/T_hm2	5	NA
a_carotene	7	135569422	Chr7	142442562	-----/GAATG_hm1	5	NA
lutein	7	150012056	Chr7	155250682	G/A_hm2	5	NA
phytofluene	7	154847123	Chr7	5021755	C/T_hm2	5	NA
phytofluene	7	165010864	Chr7	170579287	A/G_hm2	5	NA
zeaxanthin	7	1362386	Chr7	1465686	C/G_hm2	5	NA
zeaxanthin	7	2152623	Chr7	2268887	A/C_hm2	5	NA
zeino	7	172497552	Chr7	178333861	-/+_hm2	5	NA
zeaxanthin	8	139376251	Chr8	143529784	G/C_hm2	50	NA
zeino	8	141310040	Chr8	145470717	T/C_hm2	25	NA
zeino	8	164178361	Chr8	169173688	A/G_hm1	22	NA
b_cryp	8	146181040	Chr8	150550175	G/A_hm2	21	NA
traitKC	8	7024690	Chr8	7337995	T/C_hm2	15	NA
traitKC	8	6511195	Chr8	6826522	G/A_hm2	14	NA
lutein	8	136923407	Chr8	140950438	T/C_hm2	13	NA
zeino	8	111014604	Chr8	113732722	G/A_hm2	13	NA
zeaxanthin	8	138307618	Chr8	142384359	C/T_hm2	11	NA
a_carotene	8	71169029	Chr8	72286822	A/G_hm2	10	NA
zeino	8	171337064	Chr8	176586116	T/C_hm1	10	NA
b_cryp	8	1025238	Chr8	1167980	T/C_hm2	9	NA
b_cryp	8	145495263	Chr8	149812424	-/+_hm2	9	NA
lutein	8	13551628	Chr8	13891352	T/C_hm2	9	NA
lutein	8	14549444	Chr8	14960219	C/A_hm2	9	NA
traitKC	8	132541740	Chr8	136525765	T/C_hm1	9	NA
b_carotene	8	25876301	Chr8	26684323	C/G_hm2	8	NA
b_cryp	8	17876529	Chr8	18460370	C/T_hm2	7	NA
lutein	8	131224271	Chr8	135148677	C/T_hm2	7	NA
phytofluene	8	25193674	Chr8	25991657	G/A_hm1	7	NA
traitKC	8	152492668	Chr8	157169788	C/T_hm2	7	NA
zeino	8	22841500	Chr8	23566621	A/G_hm2	7	NA
b_carotene	8	24655573	Chr8	25445587	C/T_hm2	6	NA
b_carotene	8	134379227	Chr8	138333859	C/G_hm2	6	NA
b_cryp	8	12851636	Chr8	13203640	A/G_hm2	6	NA
b_cryp	8	124330861	Chr8	127726148	T/C_hm2	6	NA
lutein	8	14848740	Chr8	15284888	G/A_hm1	6	NA
lutein	8	139376251	Chr8	143529784	G/C_hm2	6	NA
traitKC	8	130464442	Chr8	134371434	G/A_hm2	6	NA
traitKC	8	156204123	Chr8	161011891	A/C_hm2	6	NA
zeaxanthin	8	119041408	Chr8	122043877	G/A_hm2	6	NA
zeaxanthin	8	119410345	Chr8	122446685	T/C_hm2	6	NA
zeaxanthin	8	135775741	Chr8	139740642	A/C_hm1	6	NA
zeino	8	1161582	Chr8	1302143	G/A_hm2	6	NA
a_carotene	8	70726330	Chr8	71827995	A/G_hm2	5	NA
a_carotene	8	140171192	Chr8	144391260	G/A_hm2	5	NA
b_carotene	8	134952897	Chr8	138892516	C/T_hm2	5	NA
b_cryp	8	105562	Chr8	266256	T/C_hm2	5	NA
lutein	8	13345499	Chr8	13695694	AT/--_hm1	5	NA
lutein	8	144436699	Chr8	148675361	C/G_hm2	5	NA
phytofluene	8	12932681	Chr8	13285689	A/G_hm2	5	NA
traitKC	8	145804092	Chr8	150167916	C/G_hm2	5	NA
zeino	8	111010400	Chr8	113736926	T/C_hm2	5	NA
traitKC	9	148941955	Chr9	152071512	+/-_hm2	44	NA
zeaxanthin	9	149593887	Chr9	152730612	+/-_hm2	36	NA
traitKC	9	20593186	Chr9	20387882	C/G_hm2	35	NA
a_carotene	9	153513723	Chr9	156674959	G/C_hm2	30	NA
traitKC	9	153830884	Chr9	156978669	C/T_hm2	28	NA
a_carotene	9	137751910	Chr9	140346454	T/G_hm2	26	NA
lutein	9	20820006	Chr9	20623744	A/G_hm2	20	NA
b_carotene	9	20906365	Chr9	20714280	C/T_hm2	18	NA
zeaxanthin	9	107083372	Chr9	109754862	A/C_hm2	18	NA
total_carot	9	154455855	Chr9	157626066	A/G_hm2	15	NA
lutein	9	152305049	Chr9	155445532	G/T_hm2	13	NA
phytofluene	9	155642753	Chr9	158728715	C/T_hm2	13	NA
total_carot	9	155278412	Chr9	158366192	G/T_hm2	12	NA
traitKC	9	20606888	Chr9	20401584	G/A_hm1	12	NA
a_carotene	9	152205947	Chr9	155348138	C/G_hm2	11	NA
total_carot	9	20465739	Chr9	20244854	A/G_hm2	10	NA
zeaxanthin	9	149621738	Chr9	152731396	A/C_hm2	10	NA
a_carotene	9	56861183	Chr9	73355242	G/A_hm1	9	NA
traitKC	9	155549055	Chr9	158661731	T/C_hm2	9	NA
total_carot	9	20464658	Chr9	20243773	A/G_hm2	8	NA
total_carot	9	20823228	Chr9	20626966	-/C_hm1	8	NA
lutein	9	20823045	Chr9	20626783	C/G_hm1	7	NA
phytofluene	9	154440345	Chr9	157610558	C/T_hm2	7	NA
traitKC	9	152765646	Chr9	155909278	G/T_hm2	7	NA
zeaxanthin	9	150607853	Chr9	153776350	G/C_hm2	7	NA
zeino	9	148197997	Chr9	151213428	A/G_hm2	7	NA
a_carotene	9	153855286	Chr9	157003071	C/T_hm2	6	NA
b_carotene	9	12313013	Chr9	11696345	A/G_hm2	6	NA
total_carot	9	20823045	Chr9	20626783	C/G_hm1	6	NA
total_carot	9	155586140	Chr9	158677913	G/C_hm2	6	NA
traitKC	9	154392984	Chr9	157563198	T/C_hm2	6	NA
zeaxanthin	9	107083308	Chr9	109754926	G/A_hm2	6	NA
zeaxanthin	9	155278412	Chr9	158366192	G/T_hm2	6	NA
zeino	9	153936254	Chr9	157084939	A/G_hm2	6	NA
lutein	9	20455161	Chr9	20234276	G/A_hm2	5	NA
lutein	9	20777387	Chr9	20563110	C/T_hm2	5	NA
lutein	9	21066229	Chr9	20872077	T/C_hm2	5	NA
lutein	9	147650605	Chr9	150669472	G/C_hm1	5	NA
total_carot	9	20831293	Chr9	20635428	C/T_hm2	5	NA
total_carot	9	20831562	Chr9	20635697	G/A_hm2	5	NA
traitKC	9	20823045	Chr9	20626783	C/G_hm1	5	NA
zeaxanthin	9	107367702	Chr9	109435162	G/A_hm2	5	NA
zeino	9	136804234	Chr9	139389586	T/C_hm2	5	NA
b_carotene	10	137665241	Chr10	138887064	C/T_hm2	40	NA
lutein	10	140648510	Chr10	141359154	C/A_hm2	27	NA
total_carot	10	140518108	Chr10	141305039	G/A_hm2	27	NA
zeino	10	14911340	Chr10	15211211	A/G_hm2	19	NA
total_carot	10	116649602	Chr10	117718329	G/A_hm2	18	NA
lutein	10	141356801	Chr10	142140203	C/G_hm2	14	NA
b_cryp	10	136365547	Chr10	137581644	T/A_hm2	12	NA
traitKC	10	146962245	Chr10	147763846	+/-_hm2	12	NA
total_carot	10	146498977	Chr10	147272838	C/T_hm2	9	NA
traitKC	10	136526342	Chr10	137740780	G/T_hm2	9	NA
zeino	10	15549164	Chr10	15876793	A/G_hm2	9	NA
zeino	10	146600943	Chr10	147388266	T/C_hm1	9	NA
total_carot	10	116043610	Chr10	117113317	T/C_hm2	8	NA
b_carotene	10	137301604	Chr10	138522083	C/A_hm2	6	NA
b_cryp	10	136340192	Chr10	137557173	C/G_hm1	6	NA
b_cryp	10	136373420	Chr10	137589517	C/T_hm2	6	NA
a_carotene	10	136120177	Chr10	137338987	A/C_hm2	5	NA
b_carotene	10	14676692	Chr10	14829167	G/C_hm2	5	NA
traitKC	10	8718853	Chr10	8656435	A/T_hm2	5	NA
